# Supplementary material for: Effects of Exenatide on Measures of β-Cell Function After 3 Years in Metformin-Treated Patients With Type 2 Diabetes
Source: PubMed Central journal article supplement — Diabetes Care. 2011 Aug 19;34(9):2041–7. doi: 10.2337/dc11-0291 (PMC3161303; doi:10.2337/dc11-0291), 2011-08-19

SUPPLEMENTARY DATA

Supplementary Figure 1a. Trial profile

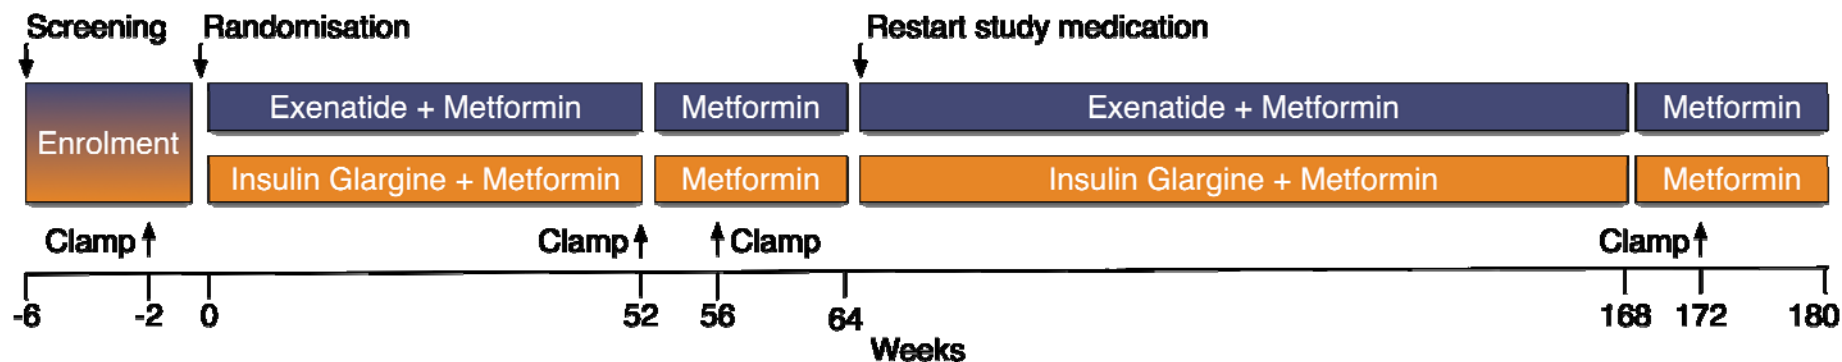

Supplementary Figure 1b. Clamp design

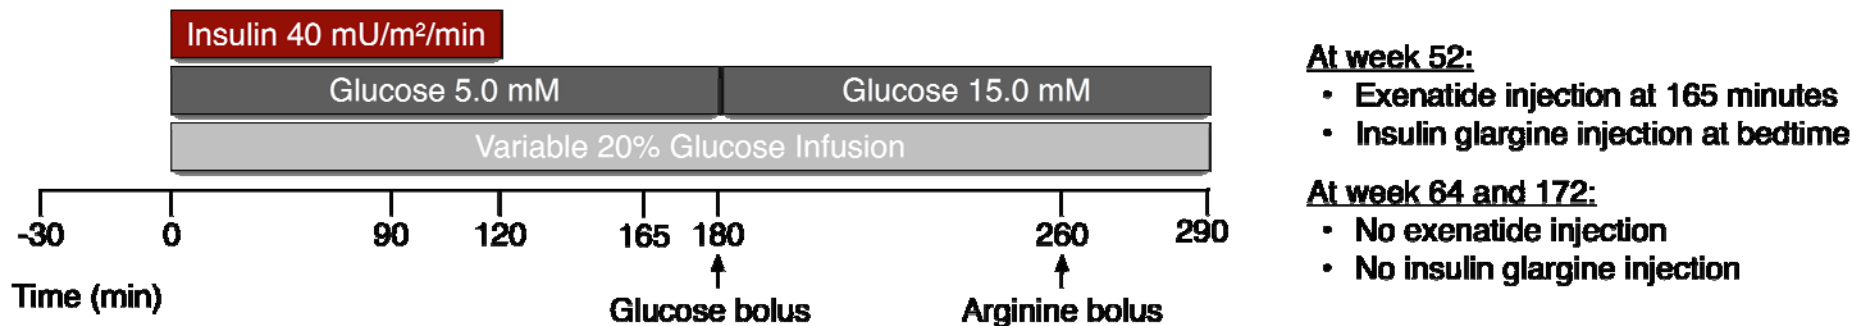

SUPPLEMENTARY DATA

**Supplementary Figure 2. Scatter plot showing the relation between treatment induced change in body weight and change in disposition index, calculated for the week 172 hyperglycemic clamp test. White circles = GLAR; black circles = EXE.**

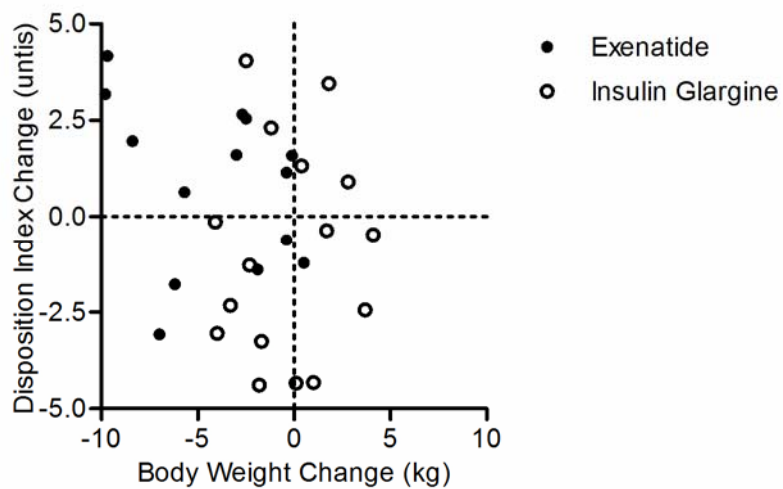

Supplement: supp_dc11-0291v110291_DC110291SupplementaryData.pdf [file supp_dc11-0291v110291_DC110291SupplementaryData.pdf]
